# Supplementary material for: Characteristics and formation mechanism of continuous hazes in China: a case study during the autumn of 2014 in the North China Plain
Source: Copernicus journal article supplement (doi:10.5194/acp-15-8165-2015), 2015-07-23
Supplement: Supplementary file 1 [file acp-15-8165-2015-supplement.pdf]

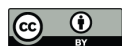

*Supplement of*

**Characteristics and formation mechanism of continuous hazes in China:  
a case study during the autumn of 2014 in the North China Plain**

**Y. R. Yang et al.**

*Correspondence to:* X. G. Liu ([liuxingang@bnu.edu.cn](mailto:liuxingang@bnu.edu.cn)) and Y. H. Zhang ([yhzhang@pku.edu.cn](mailto:yhzhang@pku.edu.cn))

The copyright of individual parts of the supplement might differ from the CC-BY 3.0 licence.

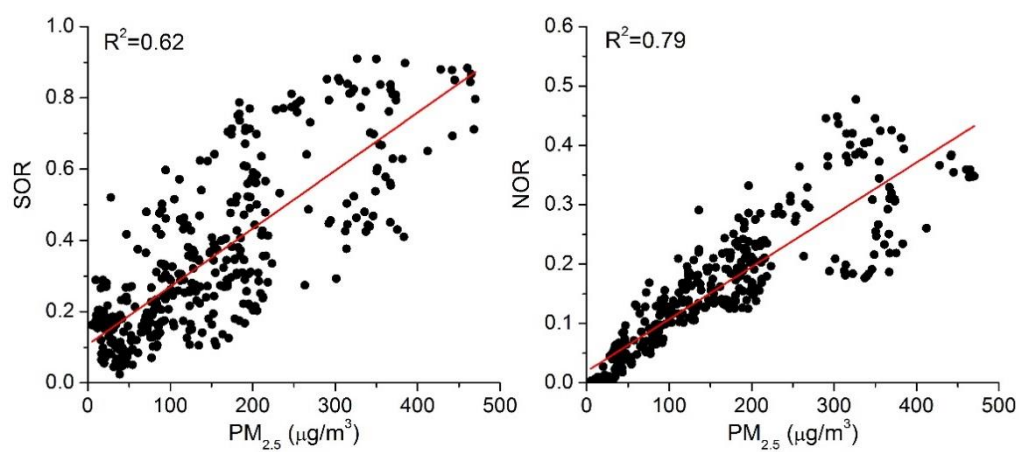

**Fig.S1 Relationship between  $PM_{2.5}$  and SOR, NOR.**
